1 **Viscoelastic characteristics of the canine cranial cruciate**  
2 **ligament complex at slow strain rates**

3

4 Rosti Readioff<sup>1</sup>, Brendan Geraghty<sup>2</sup>, Ahmed Elsheikh<sup>1,3,4</sup> and Eithne Comerford<sup>2,5</sup>

5

6 <sup>1</sup> School of Engineering, University of Liverpool, Liverpool, L69 3GH, UK.

7 <sup>2</sup> Institute of Life Course and Medical Sciences, University of Liverpool, William Henry  
8 Duncan Building, 6 West Derby Street, L7 8TX, UK.

9 <sup>3</sup> Beijing Advanced Innovation Center for Biomedical Engineering, Beihang University,  
10 Beijing, 100083, China.

11 <sup>4</sup> NIHR Moorfields BRC, 2/12 Wolfson Building, UCL Institute of Ophthalmology, 11-43  
12 Bath Street, London, EC1V 9EL, UK

13 <sup>5</sup> School of Veterinary Science, Leahurst Campus, University of Liverpool, Chester High  
14 road, Neston, CH64 7TE, UK.

15

16 Corresponding Author:

17 Rosti Readioff<sup>1</sup>

18 School of Pharmacy and Bioengineering, Keele University, Staffordshire, ST4 7QB, UK.

19 E-mail address: [r.readioff@keele.ac.uk](mailto:r.readioff@keele.ac.uk)

20

21 **Abstract**

22 Ligaments including the cruciate ligaments support and transfer loads between bones applied  
23 to the knee joint organ. The functions of these ligaments can get compromised due to changes  
24 to their viscoelastic material properties. Currently there are discrepancies in the literature on  
25 the viscoelastic characteristics of knee ligaments which are thought to be due to tissue  
26 variability and different testing protocols.

27 The aim of this study was to characterise the viscoelastic properties of healthy cranial  
28 cruciate ligaments (CCLs), from the canine knee (stifle) joint, with a focus on the toe region  
29 of the stress-strain properties where any alterations in the extracellular matrix which would  
30 affect viscoelastic properties would be seen.

31 Six paired CCLs, from skeletally mature and disease-free Staffordshire bull terrier stifle  
32 joints were retrieved as a femur-CCL-tibia complex and mechanically tested under uniaxial  
33 cyclic loading up to 10 N at three strain rates, namely 0.1, 1 and 10 %/min, to assess the  
34 viscoelastic property of strain rate dependency. The effect of strain history was also  
35 investigated by subjecting contralateral CCLs to an ascending (0.1, 1 and 10 %/min) or  
36 descending (10, 1 and 0.1 %/min) strain rate protocol.

37 The differences between strain rates were not statistically significant. However, hysteresis  
38 and recovery of ligament lengths showed some dependency on strain rate. Only hysteresis  
39 was affected by the test protocol and lower strain rates resulted in higher hysteresis and lower  
40 recovery. These findings could be explained by the slow process of uncrimping of collagen  
41 fibres and the contribution of proteoglycans in the ligament extracellular matrix to intra-  
42 fibrillar gliding, which results in more tissue elongations and higher energy dissipation.

43 This study further expands our understanding of canine CCL behaviour, providing data for  
44 material models of femur-CCL-tibia complexes, and demonstrating the challenges for  
45 engineering complex biomaterials such as knee joint ligaments.

## 46 **Introduction**

47 Ligaments play a major role in stifle (knee) joint stability (Budras, 2007; Levangie and  
48 Norikin, 2005), with part of the primary support being provided by the cranial cruciate  
49 ligament (CCL) (Carpenter and Cooper, 2000; Slatter, 2002). The CCL is the most commonly  
50 ruptured canine stifle joint ligament (CCLR) (Arnoczky, 1988; Gianotti et al., 2009)  
51 following acute injury or chronic disease, which can lead to destabilisation of surrounding  
52 structures and the subsequent development of osteoarthritis (Arnoczky, 1988; Bennett et al.,  
53 1988; Brooks, 2002; Comerford et al., 2006). There is a large economic cost associated with  
54 managing canine CCLR, for example in the United States alone the economic cost was  
55 estimated to be at least one billion dollars in 2003 (Wilke et al., 2005). Both human and  
56 canine CCL failure significantly increases the incidence of age-associated joint degeneration  
57 (Lee et al., 2014; Liu et al., 2003; Peters et al., 2018) and so understanding the tissue's  
58 fundamental material properties can assist with the prediction and effective management of  
59 ligament injuries.

60 The phenomenon of viscoelastic characteristics including strain rate dependency, hysteresis,  
61 creep and stress relaxation has been observed consistently in soft biological tissues such as  
62 the sclera (Elsheikh et al., 2010; Geraghty et al., 2020), cornea (Elsheikh et al., 2011; Kazaili  
63 et al., 2019), and tendon (Robinson et al., 2004; Zuskov et al., 2020). Similarly, ligaments  
64 inherit non-linear viscoelastic characteristics exhibiting both elastic and viscous behaviour,  
65 hence they are history- and time-dependent (Bonner et al., 2015; Fung, 1993; Ristaniemi et  
66 al., 2018). The initial part of the non-linear load-deformation behaviour in ligaments is the  
67 toe region where the wavy collagen fibres become taut and straighten as load is applied,  
68 hence the crimp is removed (Fratzl et al., 1998). In this zone, there is a relatively large  
69 deformation of the tissue with little increase in load and this permits initial joint deformations

70 with minimal tissue resistance (Dale and Baer, 1974; Fratzl et al., 1998; Wingfield et al.,  
71 2000).

72 Several studies tested for material characteristics of knee joint ligaments at traumatic loading  
73 rates and to failure loads (Crisco et al., 2002; Crowninshield and Pope, 1976; Lydon et al.,  
74 1995). The loading rate is reported to be directly proportional to the tension which develops  
75 in ligaments (Pioletti et al., 1999; Woo et al., 1990b). This characteristic was also evident in a  
76 study investigating lower strain rates between approximately 2 and 54 %/min representing  
77 physiological conditions other than trauma (Haut and Little, 1969). The study reported no  
78 change in the overall shape of the stress-strain curve, however, rapid change in the tangent  
79 modulus was found with the slow strain rates (between 1.7 and 10.8 %/min) and the change  
80 became progressively smaller with higher strain rates (above 10.8 %/min). Similarly, it was  
81 reported that strain rate dependency decreases with the increase of deformation rate (Bonner  
82 et al., 2015; Crisco et al., 2002). The stress-strain behaviour in the toe region (6% strain)  
83 showed strain rate dependency in canine CCL (Haut and Little, 1969). However, a study on  
84 rabbit medial collateral ligament complexes at varying strain rates (between 0.66 and 9300  
85 %/min) showed that the ligaments were only minimally strain rate dependent (Woo et al.,  
86 1990b, 1981). The small effect of strain rate stiffening could be because the studies combined  
87 stress-strain characteristics at the toe region with the elastic region (Haut and Little, 1969;  
88 Ristaniemi et al., 2018).

89 During high strain rates, hysteresis (energy dissipated) in the ligament may protect the tissue  
90 from injury (Bonifasi-Lista et al., 2005). However, there are contradicting findings about  
91 hysteresis in soft biological tissues in relation to strain rates. Initially, hysteresis was believed  
92 to be weakly dependent on strain rates (Fung, 1993). In contrary, a study on the viscoelastic  
93 tensile response of bovine cornea showed an increase in hysteresis with decreasing strain  
94 rates (Boyce et al., 2007). It is suggested that Fung's belief in this phenomenon was based on

95 a small number of experiments on rabbit papillary muscle using only three different strain  
96 rates (Haslach, 2005). Hence, Fung's findings only approximately support the independence  
97 of hysteresis from strain rates.

98 Therefore, there is a lack of understanding on the strain rate dependency and hysteresis of  
99 canine CCLs. Current information is limited to no clear methodological investigations on the  
100 strain rate dependency and hysteresis of the CCLs at the toe region (the initial part of non-  
101 linear load-deformation behaviour) where collagen fibres tighten and uncrimps with applied  
102 load, and importantly, any alterations in the extracellular matrix will be observed  
103 (Comerford et al., 2014; Lujan et al., 2009). Therefore, the purpose of this study was to  
104 characterise the viscoelastic properties of healthy canine CCLs as a femur-CCL-tibia  
105 complex, with a focus on the toe region of the stress-strain properties. This quantification is  
106 important when comparing the mechanical characteristics of the CCL and when developing  
107 synthetic, auto and allo-grafts to be used in future therapies for ligament replacement.

108

## 109 **Materials & Methods**

### 110 *Cranial cruciate ligament storage and preparation*

111 Cadaveric disease-free canine stifle joint pairs from skeletally mature Staffordshire bull  
112 terriers (n=6 pairs) euthanatized for reasons other than musculoskeletal injury were obtained  
113 with full ethical permission from the Veterinary Research Ethics Committee ((VREC65),  
114 Institute of Veterinary Science, University of Liverpool). Inclusion criteria for cadaveric  
115 samples were a bodyweight >15kg and age between 1.5 and 5 years old. The entire stifle  
116 joints were frozen at -20°C until required and defrosted at room temperature prior to  
117 removing the CCLs as a femur-CCL-tibia complex (Readioff, 2017; Readioff et al., 2020). In  
118 order to harvest the femur-CCL-tibia complex, initially the stifle joints were dissected.

119 Subsequently, approximately 10 mm of the femoral and tibial bones were left connected to  
120 the CCLs which allowed for the measurement of end-to-end ligament deformation as well as  
121 helping to facilitate the clamping of the specimen (Fig. 1).

122 The extracted femur-CCL-tibia complexes were maintained in a moistened state in paper  
123 towels soaked with phosphate buffered saline (PBS; Sigma, Poole, UK) and frozen at -80°C  
124 until they were required for testing (Woo et al., 1986). Prior to testing, the samples were  
125 thawed at room temperature and two 1.1 mm arthrodesis wires (Veterinary Instrumentation,  
126 Sheffield, UK) were drilled through the tibial and femoral bone ends (Fig. 1). These pins  
127 were placed to provide extra grip as well as to replicate the ligament's slight proximal-to-  
128 distal outward spiral when secured using custom built steel clamps (Arnoczky, 1983;  
129 Arnoczky and Marshall, 1977). The ducktail clamps were designed to provide a secure grip  
130 as well as ensuring that the CCLs were free and unobstructed throughout the experiment (Fig.  
131 2). The clamped samples were then mounted on a mechanical testing machine.

132

### 133 *Cranial cruciate ligament length*

134 A modified version of a previously described method was used to determine the average  
135 length of CCL from the craniomedial and caudolateral portions of a ligament (Comerford et  
136 al., 2005; Vasseur et al., 1991). In this study, measurements between the insertion and origin  
137 of the CCLs at the cranial and caudal planes, as well as the lateral and medial planes were  
138 taken using a Vernier callipers (D00352, Duratool, Taiwan) accurate to  $\pm 10 \mu\text{m}$ . The mean  
139 values of these four length measurements were recorded to give an accurate record of the  
140 length of the CCL before deformation (Supplementary Materials (Fig. S1)).

141

142 *Cranial cruciate ligament cross-sectional area*

143 The method by Goodship and Birch was used to measure cross sectional area (CSA) of the  
144 CCLs (Goodship and Birch, 2005). In brief, alginate dental impression paste (UnoDent,  
145 UnoDent Ltd., UK) was used to make a mould around the CCL. Once set, the mould was  
146 removed from the CCL and was used to create replicas of the CCLs. The replicas were cut  
147 into two in the middle and the surface of the replicas showing middle CSA were estimated  
148 using ImageJ (a public domain Java image processing program) (Supplementary Materials  
149 (Fig. S2)).

150

151 *Mechanical testing*

152 An Instron 3366 materials testing machine (Instron, Norwood, MA) fitted with a 10 N load  
153 cell (Instron 2530-428 with  $\pm 0.025$  N accuracy) was used to perform tensile tests. Initially, a  
154 preload of 0.1 N was applied to remove laxity within the CCL (Provenzano et al., 2002).  
155 Application of the preload was then followed by preconditioning the CCLs to ensure that they  
156 were in a steady state and would produce comparable and reproducible load-elongation  
157 curves (Butler et al., 1978; Fung, 1993; Savelberg et al., 1993). Preconditioning involved  
158 performing ten loading-unloading cycles up to a maximum load of 10 N at 10 %/min strain  
159 rate (Ebrahimi et al., 2019; Woo et al., 1991). Subsequently the CCL was subjected to cyclic  
160 tensile loading-unloading tests investigating stress-strain behaviour of the ligament at the toe  
161 region through the application of 10 N load at sequential slow strain rates of 0.1, 1 and 10  
162 %/min. Each strain rate consisted of three loading-unloading cycles which allowed for  
163 reproducible results. Between each two cycles, including the preconditioning procedure, a  
164 period of six minutes recovery time was given (Ebrahimi et al., 2019; Viidik, 1968). From the  
165 paired stifle joints, the left CCLs were exposed to an ascending strain rate test in which the  
166 rate of strain was increased from 0.1 to 1 and to 10 %/min and the right CCLs were exposed

167 to a descending strain rate in which the CCL was tested under decreasing strain rates from 10  
168 to 1 and to 0.1 %/min (Pioletti et al., 1999; Pioletti and Rakotomanana, 2000). A slow speed  
169 was chosen to better observe tissue response to loading at the toe region of load-deformation  
170 curves. The reverse orders of strain rate tests (ascending and descending strain rates tests)  
171 were carried out to identify characteristics associated with strain history of the ligaments at  
172 the toe region.

173

#### 174 *Data Analysis*

175 All analyses on the collected load-deformation data were performed using Excel spreadsheets  
176 (Microsoft Office 2010, US) and graphs were plotted using MATLAB (MATLAB R2020a)  
177 (code for the graphs can be found in the Supplementary Materials). Nominal stress and strain  
178 values were estimated following Equations 1 and 2 (Haut and Little, 1969; Woo et al., 1981)  
179 and from these stress and strain values, tangent modulus values were determined (Equation  
180 3). Numerical integrations were used to estimate hysteresis which is defined by the area  
181 between loading and unloading stress-strain curves (Elsheikh et al., 2008). In addition,  
182 ligament extension before and after recovery were studied to investigate strain history and  
183 strain rate dependencies as a result of applying loads at different strain rate orders (loading at  
184 ascending or descending rates).

$$\sigma = \frac{F}{CSA}$$

Equation 1

where  $\sigma$  is stress in MPa,  $F$  is applied load in N and  $CSA$  is cross-sectional area at the middle of the CCL in  $\text{mm}^2$ .



$$\varepsilon = \frac{\Delta L}{L_0} \quad \text{Equation 2}$$

where  $\varepsilon$  is strain,  $\Delta L$  is change in length in mm ( $\Delta L = L_0 - L_1$ ),  $L_0$  is initial length and  $L_1$  is deformed length of the CCL in mm.

$$E_{tan} = \frac{\delta\sigma}{\delta\varepsilon} \quad \text{Equation 3}$$

where  $E_{tan}$  is tangent modulus in MPa.

## 185 *Statistical Analysis*

186 CCL lengths measured at different planes were categorised into cranial, caudal, medial and  
187 lateral groups. Statistical tests were performed using one-way analysis of variance (ANOVA)  
188 followed by a Bonferroni post-hoc test for multiple comparisons.

189 A two-tailed t-test (two samples with unequal variance) was used to test for differences  
190 between results obtained from the ascending and descending strain rate tests. In addition,  
191 one-way ANOVA followed by a Bonferroni post-hoc test for multiple comparisons was  
192 performed to test dependencies of tensile responses of the ligaments on strain rates.

193 Distribution of data was illustrated in boxplots and suspected outliers were defined as any  
194 value greater than or equal to 1.5 times the interquartile range (range between the first and  
195 third quartiles).

196 All statistical analyses were performed in Microsoft Office Excel and 95% confidence level  
197 ( $p < 0.05$ ) was selected to define significance for all statistical tests.

198

## 199 **Results**

### 200 *Cranial cruciate ligament samples*

201 The CCL samples (n=6 paired stifle joints) used to investigate mechanical properties of the  
202 ligament were of mixed gender (female=3 and male=3) and the bodyweight of the cadavers  
203 were in the range of 17 to 25.5 kg ( $20.68 \pm 3.85$  kg).

204

### 205 *Cranial cruciate ligament length*

206 The lengths of the CCLs at different planes were in the range of 7.88 to 23.16 mm and the  
207 measurements at different planes of the individual ligaments are reported in Table 1.

208 The ANOVA test showed statistically significant results in measuring CCL length in different  
209 plane views. The analysis showed that length measurements recorded at different planes were  
210 statistically different except for comparisons between medial and lateral planes  
211 (Supplementary Material (Table 1)).

212

### 213 *Cranial cruciate ligament cross-sectional area*

214 The cross-sectional areas of the CCLs were in the range of 11.09 to 23.62 mm<sup>2</sup> ( $16.1 \pm 5.1$   
215 mm<sup>2</sup>) and cross-sectional areas of individual ligaments are reported in Table 2.

216

### 217 *Mechanical properties*

218 Stress-strain

219 The stress-strain curves at 0.1, 1 and 10 %/min strain rates conformed to the typical non-  
220 linear behaviour as expected in canine CCLs (Haut and Little, 1969) (Fig. 3a). The stress-  
221 strain curves illustrated an increase in stress with increasing strain, and similarly an increase  
222 in stiffness was observed with increasing strain rates (Fig. 3b). Although there was a small  
223 increase in stress with increasing strain rates, the increase was not statistically significant.

224 The stress responses of the ligaments during ascending test protocol, where the cyclic loading  
225 commenced with 0.1 %/min then increased to 1 %/min and finally to 10 %/min, were similar  
226 to responses during descending test protocol (the reverse of ascending test protocol). The  
227 stress-strain curves show that there are minimal differences in stress values between the two  
228 test protocols below 3% strain, and these differences become more distinguishable above 3%  
229 strain (Fig. 4a, b and c). The testing protocols only minimally affected the stress-strain  
230 characteristics and not statistically significant. There are notably different mechanical  
231 behaviours among the specimens, as indicated by the grey dots in Fig. 4a, b and c, and not all  
232 specimens reached 5% strain (Supplementary Materials (Fig. S3, S4 and S5).

233

234 Tangent modulus-stress

235 Tangent modulus ( $E_t$ ), indicating the stiffness behaviour of the CCLs, increased with  
236 increasing stress (Fig. 3b) in both ascending and descending testing protocols. Similar to the  
237 observations from the stress-strain curves, the tangent modulus-stress lines between the two  
238 testing protocols (ascending and descending) were only minimally different and not  
239 statistically significant. Although not statistically significant, the increase in tangent modulus  
240 with strain rates was notable at higher stress values (Fig. 4d, e and f). For example, at 0.5  
241 MPa stress, average tangent modulus values from the ascending test protocol were 26.62,  
242 31.40 and 32.66 MPa during loading at 0.1, 1 and 10 %/min strain rates.

243

## 244 Hysteresis

245 The results of this study show that hysteresis or dissipated energy are statistically different  
246 between the ascending and descending testing protocols ( $p= 0.0043$ ). The mean values for  
247 hysteresis at 0.1, 1 and 10 %/min strain rates were 0.0032 (cycle 13), 0.0020 (cycle 16) and  
248 0.0016 (cycle 19) MPa in ascending and 0.0040 (cycle 19), 0.0042 (cycle 16) and 0.0037  
249 (cycle 13) MPa in descending testing protocol (Fig. 5a). The dissipated energy decrease from  
250 the first preconditioning cycle to the tenth (last) cycle was 85% for both testing protocols. In  
251 addition, hysteresis decreased with increasing strain rates (Fig. 5b). This characteristic was  
252 statistically significant during the ascending testing protocol ( $p= 0.039$  between 0.1 and 1  
253 %/min, and  $p= 0.013$  between 0.1 and 10 %/min).

254

## 255 Recovery

256 Length of the CCLs before and after the recovery period between each cycle showed  
257 consistent values during preconditioning and these values were in the range of 0.095 to 0.078  
258 mm during ascending and 0.124 to 0.095 mm during descending tests (Fig. 6a). Unlike  
259 hysteresis, statistical analysis showed that tissue recovery was not different during ascending  
260 and descending tests. However, tissue length recovery was strain rate dependent and  
261 statistical analysis showed differences in recovery between 0.1 and 1 %/min ( $p= 0.018$ ), and  
262 0.1 and 10 %/min ( $p= 0.001$ ) (Fig. 6b).

263

## 264 Discussion

265 The aim of this study was to gain a greater understanding of the viscoelastic behaviour of the  
266 canine CCLs as a femur-CCL-tibia complex at the toe region of the stress-strain curves in  
267 order to better mechanically detail the material for its use in developing future therapies.  
268 Therefore, we carried out an experimental study investigating the nonlinear viscoelastic  
269 properties of CCLs, namely strain rate dependency, hysteresis and recovery, from healthy  
270 canine stifle joints. The findings in this study are the first to report the slow strain rate  
271 dependency of the canine cruciate ligament across three orders of magnitude with ascending  
272 and descending test arrangements. A previous study showed that with high strain rates, the  
273 toe region of stress-strain curves appears at lower strain levels (Haut and Little, 1969),  
274 however in order to study the toe region in detail without being limited to the level of strain,  
275 slow strain rates ( $\leq 10$  %/min) were utilised during mechanical tests in the current study.

276 The non-linear stress-strain pattern for the CCLs is consistent to that previously reported in  
277 studies on biological tissues such as tendons and ligaments (Bonner et al., 2015; Crisco et al.,  
278 2002; Haut and Little, 1969; Pioletti et al., 1999; Pioletti and Rakotomanana, 2000). The  
279 stress-strain and tangent modulus-stress characteristics of the CCLs were similar during the  
280 ascending and descending testing protocols (Fig. 3 and 4). These findings are similar to a  
281 previous study on bovine anterior cruciate ligament-bone complex where specimens were  
282 loaded up to 300 N at seven different strain rates (6, 60, 300, 600, 1200, 1800 and 2400  
283 %/min) and then tested for strain rate order by reloading the ligaments at the 6 and 300  
284 %/min strain rates (Pioletti et al., 1999). They found identical stress-strain behaviour for the  
285 initial and reloaded specimens suggesting no difference in changing test protocols via strain  
286 rate orders. Their study applied higher strain rates (6-2400 %/min) than those used in the  
287 current paper and they reloaded the tissue in an ascending strain rate order only. Pioletti et al.  
288 did not study tissue hysteresis or recovery, but they reported increases in linear tangent

289 moduli with increasing strain rates (although not statistically significant) which is similar to  
290 the findings in the current study.

291 The mechanical response of human knee ligaments to loading depends on strain rate which is  
292 less pronounced at lower rates (Dorlot et al., 1980; van Dommelen et al., 2005) and this was  
293 also observed in the current study. It is believed that during lower strain rates the collagen  
294 fibrils in patella tendons undergo significantly less recruitment (Clemmer et al., 2010) and  
295 this could potentially be similar in the case of the CCLs. At slow strain rates ( $\leq 10$  %/min) the  
296 collagen fibrils uncrimp with applied load and then show intra-fibrillar gliding (Bonner et al.,  
297 2015; Karunaratne et al., 2018). However, at fast strain rates ( $\geq 300$  %/min) fibrils go from an  
298 unloaded state directly to intra-fibrillar gliding where the matrix bond between the collagen  
299 molecules are broken before the removal of collagen crimps (Bonner et al., 2015). This could  
300 mean that the extracellular matrix components such as proteoglycans, which is directly linked  
301 to the mechanics of ligaments during uncrimping of the collagen fibres, might not affect the  
302 mechanical response during loads at higher strain rates.

303 In our study, hysteresis, which represents the dissipation of energy within the tissue, has  
304 shown some dependencies on strain rates and decreases with increasing strain rates (Fig. 5b).  
305 This finding contradicts the conclusions from previous literature (Bonifasi-Lista et al., 2005;  
306 Woo et al., 1981) but agrees with a recent study on tendon fascicle mechanics (Rosario and  
307 Roberts, 2020) and a study on bovine cornea (Boyce et al., 2007) which found a decrease in  
308 strain energy storage with increased loading rate. The discrepancies in results might be due to  
309 following different testing protocols, in particular the rate of applied loads. In the current  
310 study, where slow strain rates of  $\leq 10$  %/min were used, the tissue goes through more steps  
311 (uncrimping collagen fibres, intra-fibrillar gliding and then loading of collagen respectively

312 with applied loads) during lower strain rates (Bonner et al., 2015), and this slow process  
313 results in more tissue elongations hence higher energy dissipation.

314 The CCLs showed higher length recovery during higher strain rates compared to the lower  
315 strain rates (Fig. 6). This behaviour could be a result of resilience in the fascicular level of the  
316 tissue. It has been reported that during slow strain rates, the resilience in the fascicular level is  
317 lowest (Rosario and Roberts, 2020) which could lead to higher changes in the microstructural  
318 organisation of the tissue. Hence, the tissue's length might not fully recover within the same  
319 recovery time as during higher strain rate tests. However, it is important to note that although  
320 the higher strain rate might seem to result in a more recovered ligament length, it is possible  
321 that the tissue collagen fibres are still crimping back as a result of previous loading history or  
322 insufficient recovery time. Further study in this area especially at the microstructural level of  
323 knee ligaments is necessary to better understand the effects of loading rates on the  
324 organisations of the fibres and extracellular matrix.

325 There were several limitations to our study. Preparing specimens for mechanical tests as a  
326 whole unit (femur-CCL-tibia complex) might have introduced some limitations such as  
327 overlooking the complexity of the anatomical structure of the CCLs which consists of two  
328 fibre bundles (caudolateral (CLB) and craniomedial bands (CMB)) functioning independently  
329 from one another in stifle joint flexion and extension (Arnoczky and Marshall, 1977;  
330 Carpenter and Cooper, 2000). Independent functioning of the CLB and the CMB allows the  
331 fibre bundles to reach their maximum potential (Arnoczky and Marshall, 1977; Carpenter and  
332 Cooper, 2000; Tanegashima et al., 2019). However, it is important to note that these two fibre  
333 bundles are not structurally segregated within the tissue, thus allowing the ligament to  
334 function as a united structure (Heffron and Campbell, 1978). In addition, the approximation  
335 methods adopted to measure the cross-sectional area and length of the specimens might be

336 considered as another limitation. Further investigation with a larger number of specimens  
337 might improve the reliability of the statistical analysis and provide a broader view on the  
338 effect of cadaveric demography (i.e. age, gender, bodyweight) on the mechanical properties  
339 and microstructural organisations of knee ligaments (Duval et al., 1999; Woo et al., 1990a,  
340 1990b).

341

## 342 **Conclusions**

343 The current study focused on the viscoelastic behaviour, such as strain rate dependency,  
344 hysteresis and recovery of canine CCLs at slow strain rates to better understand the tissue  
345 behaviour at the toe region where the constituents of the extracellular matrix makes a major  
346 contribution to ligament mechanics.

347 Our changing test protocols via strain rate orders only affected hysteresis which might be a  
348 result of the strain history of the tissue or high-level of biological variability across samples.  
349 The stress-strain of the CCLs at the toe-region associated with the extracellular matrix of the  
350 ligaments was not strain rate dependent. However, hysteresis and recovery were strain rate  
351 dependent and this is likely due to changes in microstructural organisation of the ligaments  
352 during mechanical tests.

353 The result of our study indicates the need for further investigations on the viscoelastic  
354 behaviour of the canine CCLs when loaded with different orders of strain rates, with a focus  
355 on extracellular matrix and collagen fibre organisations.

356

## 357 **Acknowledgments**



358 We thank Mr. Lee Moore, Mr. Ben Jones and the staff at Veterinary Teaching Suite, School  
359 of Veterinary Science for their assistance during sample collection. We also thank Mr. John  
360 Curran at School of Engineering, University of Liverpool, for their assistance during  
361 manufacturing parts of the experimental setup.

362

## 363 **References**

- 364 Arnoczky, S.P., 1988. The cruciate ligaments: The enigma of the canine stifle. *J. Small Anim.*  
365 *Pract.* 29, 71–90. <https://doi.org/DOI 10.1111/j.1748-5827.1988.tb02267.x>
- 366 Arnoczky, S.P., 1983. Anatomy of the anterior cruciate ligament. *Clin. Orthop.*
- 367 Arnoczky, S.P., Marshall, J.L., 1977. The cruciate ligaments of the canine stifle: An  
368 anatomical and functional analysis. *Am. J. Vet. Res.* 38, 1807–1814.
- 369 Bennett, D., Tennant, B., Lewis, D.G., Baughan, J., May, C., Carter, S., 1988. A reappraisal  
370 of anterior cruciate ligament disease in the dog. *J. Small Anim. Pract.* 29, 275–297.  
371 <https://doi.org/DOI 10.1111/j.1748-5827.1988.tb02286.x>
- 372 Bonifasi-Lista, C., Lake, S.P., Small, M.S., Weiss, J.A., 2005. Viscoelastic properties of the  
373 human medial collateral ligament under longitudinal, transverse and shear loading. *J*  
374 *Orthop Res.* <https://doi.org/10.1016/j.orthres.2004.06.002>
- 375 Bonner, T.J., Newell, N., Karunaratne, A., Pullen, A.D., Amis, A.A., A, M.J.B., Masouros,  
376 S.D., 2015. Strain-rate sensitivity of the lateral collateral ligament of the knee. *J.*  
377 *Mech. Behav. Biomed. Mater.*
- 378 Boyce, B.L., Jones, R.E., Nguyen, T.D., Grazier, J.M., 2007. Stress-controlled viscoelastic  
379 tensile response of bovine cornea. *J. Biomech.* 40, 2367–2376. [https://doi.org/DOI](https://doi.org/DOI 10.1016/j.jbiomech.2006.12.001)  
380 [10.1016/j.jbiomech.2006.12.001](https://doi.org/DOI 10.1016/j.jbiomech.2006.12.001)

- 381 Brooks, P.M., 2002. Impact of osteoarthritis on individuals and society: How much  
382 disability? Social consequences and health economic implications. *Curr. Opin.*  
383 *Rheumatol.* <https://doi.org/10.1097/00002281-200209000-00017>
- 384 Budras, K.-D., 2007. *Anatomy of the dog*, 5th ed, Vet series. Schlütersche, Hannover.
- 385 Butler, D.L., Noyes, F.R., Grood, E.S., 1978. Measurement of the mechanical properties of  
386 ligaments, in: *CRC Handbook of Engineering in Medicine and Biology Section B:*  
387 *Instruments and Measurements.* CRC Press Inc., West Palm Beach, pp. 279–314.
- 388 Carpenter, D.H., Cooper, R.C., 2000. Mini review of canine stifle joint anatomy. *Anat.*  
389 *Histol. Embryol.* 29, 321–329. [https://doi.org/DOI 10.1046/j.1439-0264.2000.00289.x](https://doi.org/DOI%2010.1046/j.1439-0264.2000.00289.x)
- 390 Clemmer, J., Liao, J., Davis, D., Horstemeyer, M.F., Williams, L.N., 2010. A mechanistic  
391 study for strain rate sensitivity of rabbit patellar tendon. *J. Biomech.* 43, 2785–2791.  
392 <https://doi.org/10.1016/j.jbiomech.2010.06.009>
- 393 Comerford, E.J., Geraghty, B., Hama Rashid, R., Elsheikh, A., 2014. The Contribution of  
394 Proteoglycans to the Viscoelasticity of the Canine Anterior Cruciate Ligament.  
395 *Osteoarthritis Cartilage.*
- 396 Comerford, E.J., Tarlton, J.F., Innes, J.F., Johnson, K.A., Amis, A.A., Bailey, A.J., 2005.  
397 Metabolism and composition of the canine anterior cruciate ligament relate to  
398 differences in knee joint mechanics and predisposition to ligament rupture. *J. Orthop.*  
399 *Res.* 23, 61–66. <https://doi.org/10.1016/j.orthres.2004.05.016>
- 400 Comerford, E.J., Tarlton, J.F., Wales, A., Bailey, A.J., Innes, J.F., 2006. Ultrastructural  
401 differences in cranial cruciate ligaments from dogs of two breeds with a differing  
402 predisposition to ligament degeneration and rupture. *J Comp Pathol.*  
403 <https://doi.org/10.1016/j.jcpa.2005.06.004>
- 404 Crisco, J.J., Moore, D.C., McGovern, R.D., 2002. Strain-rate sensitivity of the rabbit MCL  
405 diminishes at traumatic loading rates. *J. Biomech.* 35, 1379–1385.

- 406 Crowninshield, R.D., Pope, M.H., 1976. The strength and failure characteristics of rat medial  
407 collateral ligaments. *J. Trauma* 16, 99–105.
- 408 Dale, W.C., Baer, E., 1974. Fiber-buckling in composite systems: A model for ultrastructure  
409 of uncalcified collagen tissues. *J. Mater. Sci.* 9, 369–382. [https://doi.org/Doi](https://doi.org/10.1007/Bf00737836)  
410 10.1007/Bf00737836
- 411 Dorlot, J.M., Ait Ba Sidi, M., Tremblay, G.M., Drouin, G., 1980. Load elongation behavior  
412 of the canine anterior cruciate ligament. *J. Biomech. Eng.*  
413 <https://doi.org/10.1115/1.3149572>
- 414 Duval, J.M., Budsberg, S.C., Flo, G.L., Sammarco, J.L., 1999. Breed, sex, and body weight  
415 as risk factors for rupture of the cranial cruciate ligament in young dogs. *J. Am. Vet.*  
416 *Med. Assoc.* 215, 811–814.
- 417 Ebrahimi, M., Mohammadi, A., Ristaniemi, A., Stenroth, L., Korhonen, R.K., 2019. The  
418 effect of different preconditioning protocols on repeatability of bovine ACL stress-  
419 relaxation response in tension. *J. Mech. Behav. Biomed. Mater.* 90, 493–501.  
420 <https://doi.org/10.1016/j.jmbbm.2018.10.041>
- 421 Elsheikh, A., Geraghty, B., Alhasso, D., Knappett, J., Campanelli, M., Rama, P., 2010.  
422 Regional variation in the biomechanical properties of the human sclera. *Exp. Eye Res.*  
423 90, 233–624. <https://doi.org/10.1016/j.exer.2010.02.010>
- 424 Elsheikh, A., Kassem, W., Jones, S.W., 2011. Strain-rate sensitivity of porcine and ovine  
425 corneas. *Acta Bioeng. Biomech.* 13, 25–36.
- 426 Elsheikh, A., Wang, D., Rama, P., Campanelli, M., Garway-Heath, D., 2008. Experimental  
427 assessment of human corneal hysteresis. *Curr. Eye Res.* 33, 205–213.  
428 <https://doi.org/10.1080/02713680701882519>

- 429 Fratzl, P., Misof, K., Zizak, I., Rapp, G., Amenitsch, H., Bernstorff, S., 1998. Fibrillar  
430 structure and mechanical properties of collagen. *J. Struct. Biol.* 122, 119–122.  
431 <https://doi.org/DOI 10.1006/jsbi.1998.3966>
- 432 Fung, Y.C., 1993. *Biomechanics: Mechanical properties of living tissues*, 2nd ed. Springer,  
433 New York.
- 434 Geraghty, B., Abass, A., Eliasy, A., Jones, S.W., Rama, P., Kassem, W., Akhtar, R.,  
435 Elsheikh, A., 2020. Inflation experiments and inverse finite element modelling of  
436 posterior human sclera. *J. Biomech.* 98, 109438.  
437 <https://doi.org/10.1016/j.jbiomech.2019.109438>
- 438 Gianotti, S.M., Marshall, S.W., Hume, P.A., Bunt, L., 2009. Incidence of anterior cruciate  
439 ligament injury and other knee ligament injuries: A national population-based study.  
440 *J. Sci. Med. Sport* 12, 622–627. <https://doi.org/10.1016/j.jsams.2008.07.005>
- 441 Goodship, A.E., Birch, H.L., 2005. Cross sectional area measurement of tendon and ligament  
442 in vitro: a simple, rapid, non-destructive technique. *J. Biomech.* 38, 605–608.  
443 <https://doi.org/DOI 10.1016/j.jbiomech.2004.05.003>
- 444 Haslach, H.W., 2005. Nonlinear viscoelastic, thermodynamically consistent, models for  
445 biological soft tissue. *Biomech. Model. Mechanobiol.* 3, 172–189.  
446 <https://doi.org/10.1007/s10237-004-0055-6>
- 447 Haut, R.C., Little, R.W., 1969. Rheological properties of canine anterior cruciate ligaments.  
448 *J. Biomech.* 2, 289–298. [https://doi.org/Doi 10.1016/0021-9290\(69\)90085-2](https://doi.org/Doi 10.1016/0021-9290(69)90085-2)
- 449 Heffron, L.E., Campbell, J.R., 1978. Morphology, histology and functional anatomy of the  
450 canine cranial cruciate ligament. *Vet. Rec.*
- 451 Karunaratne, A., Li, S., Bull, A.M.J., 2018. Nano-scale mechanisms explain the stiffening  
452 and strengthening of ligament tissue with increasing strain rate. *Sci. Rep.*  
453 <https://doi.org/10.1038/s41598-018-21786-z>

- 454 Kazaili, A., Geraghty, B., Akhtar, R., 2019. Microscale assessment of corneal viscoelastic  
455 properties under physiological pressures. *J. Mech. Behav. Biomed. Mater.* 100,  
456 103375. <https://doi.org/10.1016/j.jmbbm.2019.103375>
- 457 Lee, K., Williamson, K., Clegg, P., Comerford, E., Canty-Laird, E., 2014. The stem cell niche  
458 in tendon and ligament: investigating alterations with ageing and disease, in: *British*  
459 *Journal of Sports Medicine*. BMJ, pp. A35–A36. [https://doi.org/10.1136/bjsports-](https://doi.org/10.1136/bjsports-2014-094114.54)  
460 2014-094114.54
- 461 Levangie, P.K., Norkin, C.C., 2005. *Joint structure and function: A comprehensive analysis*,  
462 4th ed. F.A. Davis Co., Philadelphia.
- 463 Liu, W.H., Burton-Wurster, N., Glant, T.T., Tashman, S., Sumner, D.R., Kamath, R.V., Lust,  
464 G., Kimura, J.H., Cs-Szabo, G., 2003. Spontaneous and experimental osteoarthritis in  
465 dog: similarities and differences in proteoglycan levels. *J. Orthop. Res.*  
466 [https://doi.org/Doi 10.1016/S0736-0266\(03\)00002-0](https://doi.org/Doi%2010.1016/S0736-0266(03)00002-0)
- 467 Lujan, T.J., Underwood, C.J., Jacobs, N.T., Weiss, J.A., 2009. Contribution of  
468 glycosaminoglycans to viscoelastic tensile behavior of human ligament. *J. Appl.*  
469 *Physiol.* <https://doi.org/10.1152/jappphysiol.90748.2008>
- 470 Lydon, C., Crisco, J.J., Panjabi, M., Galloway, M., 1995. Effect of elongation rate on the  
471 failure properties of the rabbit anterior cruciate ligament. *Clin. Biomech.* 10, 428–433.
- 472 Peters, A.E., Akhtar, R., Comerford, E.J., Bates, K.T., 2018. The effect of ageing and  
473 osteoarthritis on the mechanical properties of cartilage and bone in the human knee  
474 joint. *Sci. Rep.* 8, 5931. <https://doi.org/10.1038/s41598-018-24258-6>
- 475 Pioletti, D.P., Rakotomanana, L.R., 2000. Non-linear viscoelastic laws for soft biological  
476 tissues. *Eur. J. Mech. - ASolids* 19, 749–759. [https://doi.org/Doi 10.1016/S0997-](https://doi.org/Doi%2010.1016/S0997-7538(00)00202-3)  
477 7538(00)00202-3

- 478 Pioletti, D.P., Rakotomanana, L.R., Leyvraz, P.F., 1999. Strain rate effect on the mechanical  
479 behavior of the anterior cruciate ligament–bone complex. *Med. Eng. Phys.* 21, 95–  
480 100. [https://doi.org/10.1016/S1350-4533\(99\)00028-4](https://doi.org/10.1016/S1350-4533(99)00028-4)
- 481 Provenzano, P.P., Heisey, D., Hayashi, K., Lakes, R., Vanderby R., Jr., 2002. Subfailure  
482 damage in ligament: A structural and cellular evaluation. *J. Appl. Physiol.* 92, 362–  
483 371.
- 484 Radioff, R., 2017. *Viscoelastic Behaviour of the Canine Cranial Cruciate Ligament*  
485 *Complex*. University of Liverpool.
- 486 Radioff, R., Geraghty, B., Comerford, E., Elsheikh, A., 2020. A full-field 3D digital image  
487 correlation and modelling technique to characterise anterior cruciate ligament  
488 mechanics ex vivo. *Acta Biomater.* 113, 417–428.  
489 <https://doi.org/10.1016/j.actbio.2020.07.003>
- 490 Ristaniemi, A., Stenroth, L., Mikkonen, S., Korhonen, R.K., 2018. Comparison of elastic,  
491 viscoelastic and failure tensile material properties of knee ligaments and patellar  
492 tendon. *J. Biomech.* 79, 31–38. <https://doi.org/10.1016/j.jbiomech.2018.07.031>
- 493 Robinson, P.S., Lin, T.W., Reynolds, P.R., Derwin, K.A., Iozzo, R. V, Soslowsky, L.J., 2004.  
494 Strain-rate sensitive mechanical properties of tendon fascicles from mice with  
495 genetically engineered alterations in collagen and decorin. *J. Biomech. Eng.* 126,  
496 252–257.
- 497 Rosario, M.V., Roberts, T.J., 2020. Loading Rate Has Little Influence on Tendon Fascicle  
498 Mechanics. *Front. Physiol.* 11. <https://doi.org/10.3389/fphys.2020.00255>
- 499 Savelberg, H.H.C.M., Kooloos, J.G.M., Huiskes, R., Kauer, J.M.G., 1993. An Indirect  
500 Method to Assess Wrist Ligament Forces with Particular Regard to the Effect of  
501 Preconditioning. *J. Biomech.* 26, 1347–1351. [https://doi.org/10.1016/0021-](https://doi.org/10.1016/0021-9290(93)90358-L)  
502 [9290\(93\)90358-L](https://doi.org/10.1016/0021-9290(93)90358-L)

- 503 Slatter, D.H., 2002. Textbook of small animal surgery, 3rd ed. Saunders, Philadelphia.
- 504 Tanegashima, K., Edamura, K., Akita, Y., Yamazaki, A., Yasukawa, S., Seki, M., Asano, K.,  
505 Nakayama, T., Katsura, T., Hayashi, K., 2019. Functional Anatomy of the  
506 Craniomedial and Caudolateral Bundles of the Cranial Cruciate Ligament in Beagle  
507 Dogs. *Vet. Comp. Orthop. Traumatol. VCOT* 32, 182–191. [https://doi.org/10.1055/s-](https://doi.org/10.1055/s-0039-1678711)  
508 0039-1678711
- 509 van Dommelen, J.A.W., Ivarsson, B.J., Jolandan, M.M., Millington, S.A., Raut, M., Kerrigan,  
510 J.R., Crandall, J.R., Diduch, D.R., 2005. Characterization of the Rate-Dependent  
511 Mechanical Properties and Failure of Human Knee Ligaments. *SAE Trans.* 114, 80–  
512 90.
- 513 Vasseur, P.B., Stevenson, S., Gregory, C.R., Rodrigo, J.J., Pauli, S., Heitter, D., Sharkey, N.,  
514 1991. Anterior cruciate ligament allograft transplantation in dogs. *Clin. Orthop.* 295–  
515 304.
- 516 Viidik, A., 1968. Elasticity and tensile strength of anterior cruciate ligament in rabbits as  
517 influenced by training. *Acta Physiol. Scand.* 74, 372–380. <https://doi.org/DOI>  
518 10.1111/j.1748-1716.1968.tb04245.x
- 519 Wilke, V.L., Robinson, D.A., Evans, R.B., Rothschild, M.F., Conzemius, M.G., 2005.  
520 Estimate of the annual economic impact of treatment of cranial cruciate ligament  
521 injury in dogs in the United States. *J. Am. Vet. Med. Assoc.* 227, 1604–1607.
- 522 Wingfield, C., Amis, A.A., Stead, A.C., Law, H.T., 2000. Comparison of the biomechanical  
523 properties of rottweiler and racing greyhound cranial cruciate ligaments. *J. Small*  
524 *Anim. Pract.* 41, 303–307. <https://doi.org/DOI> 10.1111/j.1748-5827.2000.tb03206.x
- 525 Woo, S.L., Orlando, C.A., Camp, J.F., Akeson, W.H., 1986. Effects of postmortem storage  
526 by freezing on ligament tensile behavior. *J. Biomech.* 19, 399–404.

- 527 Woo, S.L.Y., Gomez, M.A., Akeson, W.H., 1981. The time and history-dependent  
528 viscoelastic properties of the canine medial collateral ligament. *J. Biomech. Eng.*  
529 103, 293–298.
- 530 Woo, S.L.Y., Hollis, J.M., Adams, D.J., Lyon, R.M., Takai, S., 1991. Tensile properties of  
531 the human femur-anterior cruciate ligament-tibia complex. The effects of specimen  
532 age and orientation. *Am. J. Sports Med.* 19, 217–225.
- 533 Woo, S.L.Y., Ohland, K.J., Weiss, J.A., 1990a. Aging and sex-related changes in the  
534 biomechanical properties of the rabbit medial collateral ligament. *Mech. Ageing Dev.*  
535 56, 129–142.
- 536 Woo, S.L.Y., Peterson, R.H., Ohland, K.J., Sites, T.J., Danto, M.I., 1990b. The effects of  
537 strain rate on the properties of the medial collateral ligament in skeletally immature  
538 and mature rabbits: a biomechanical and histological study. *J. Orthop. Res.* 8, 712–  
539 721. <https://doi.org/10.1002/jor.1100080513>
- 540 Zuskov, A., Freedman, B.R., Gordon, J.A., Sarver, J.J., Buckley, M.R., Soslowky, L.J.,  
541 2020. Tendon Biomechanics and Crimp Properties Following Fatigue Loading Are  
542 Influenced by Tendon Type and Age in Mice. *J. Orthop. Res. Off. Publ. Orthop. Res.*  
543 *Soc.* 38, 36–42. <https://doi.org/10.1002/jor.24407>  
544



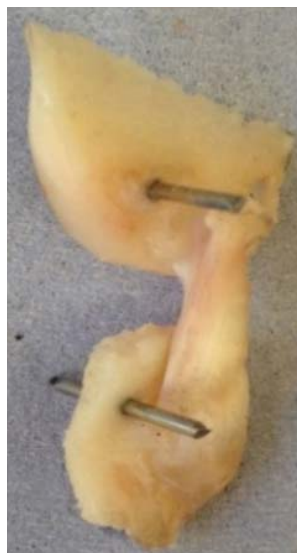

**Figure 1:** The extracted cranial cruciate ligaments (CCL) consisted of approximately 10 mm of the femoral and tibial bones forming femur-CCL-tibia complex. Two 1.1 mm arthrodesis wires were drilled through the bones to facilitate clamping of the sample.

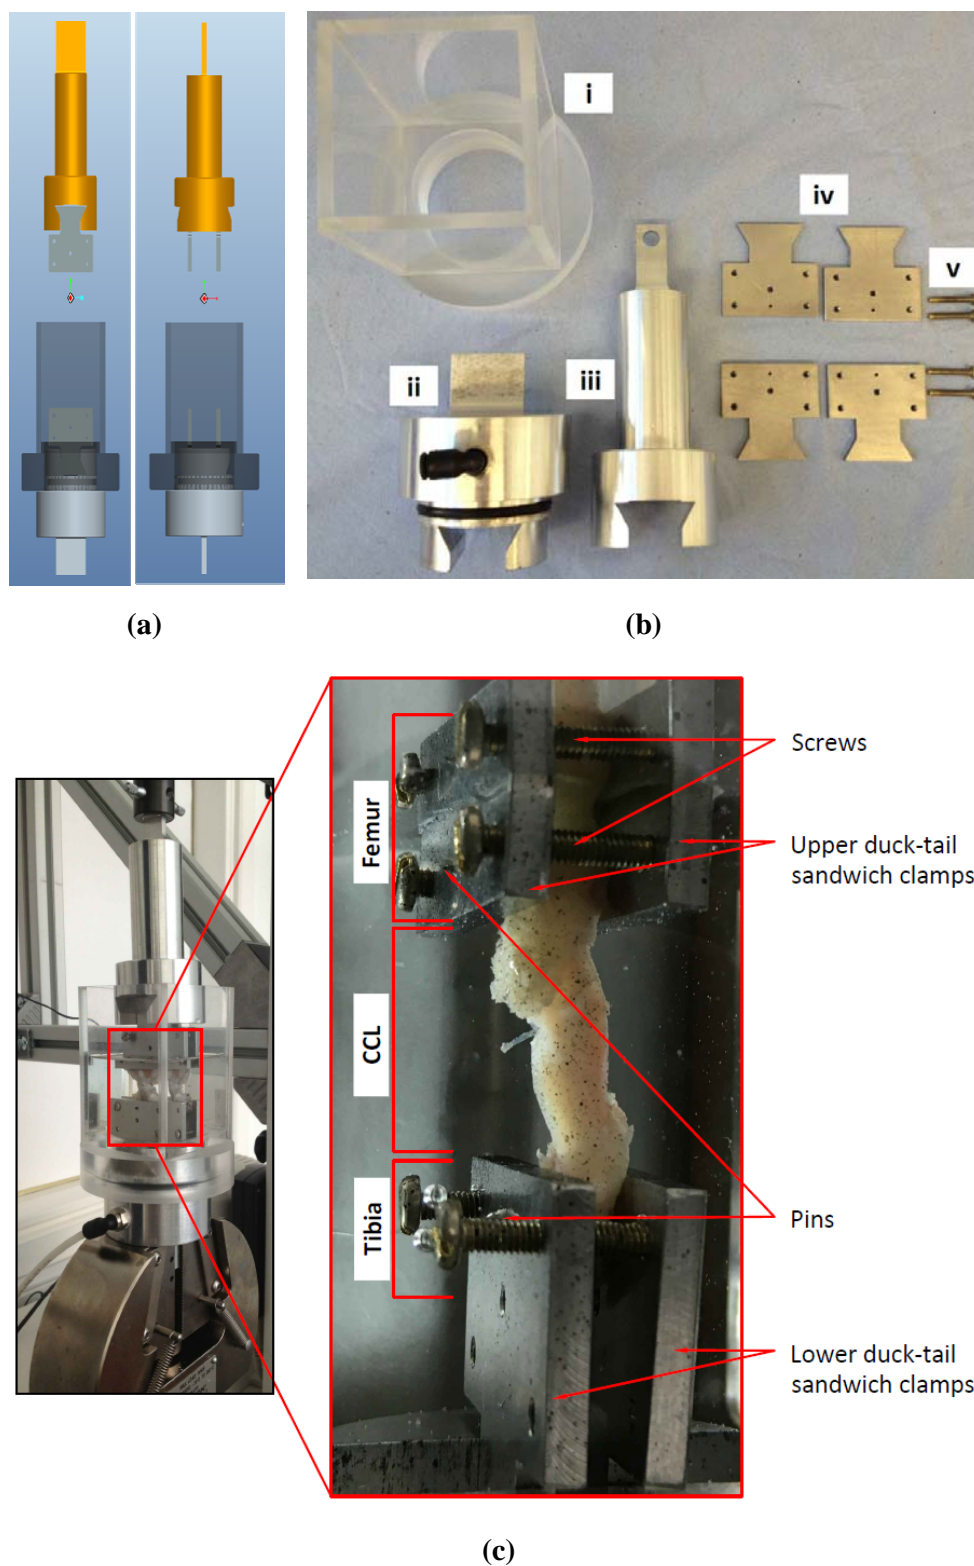

**Figure 2:** The experimental test setup, with (a) showing the design of the custom-made clamps that was used for (b) manufacturing the parts of the experimental testing rig. The

custom-built clamps included a (i) cylindrical Perspex tank, (ii) lower and (iii) top grips, (iv) duck-tail sandwich clamps and (v) screws. (c) An example of a cranial cruciate ligament (CCL) clamped and placed in the Perspex tank.

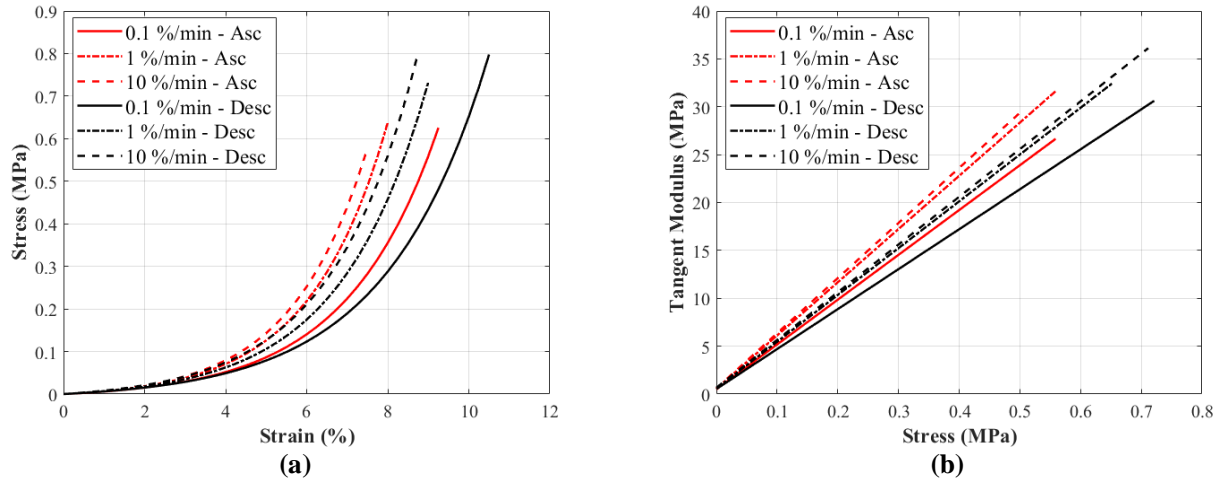

**Figure 3:** A typical (a) stress-strain and (b) tangent modulus-stress behaviour of a canine cranial cruciate ligament (CCL) at varying strain rates. The tensile characteristics of the CCLs was investigated following ascending (Asc) and descending (Desc) protocols at 0.1, 1 and 10 %/min strain rates.

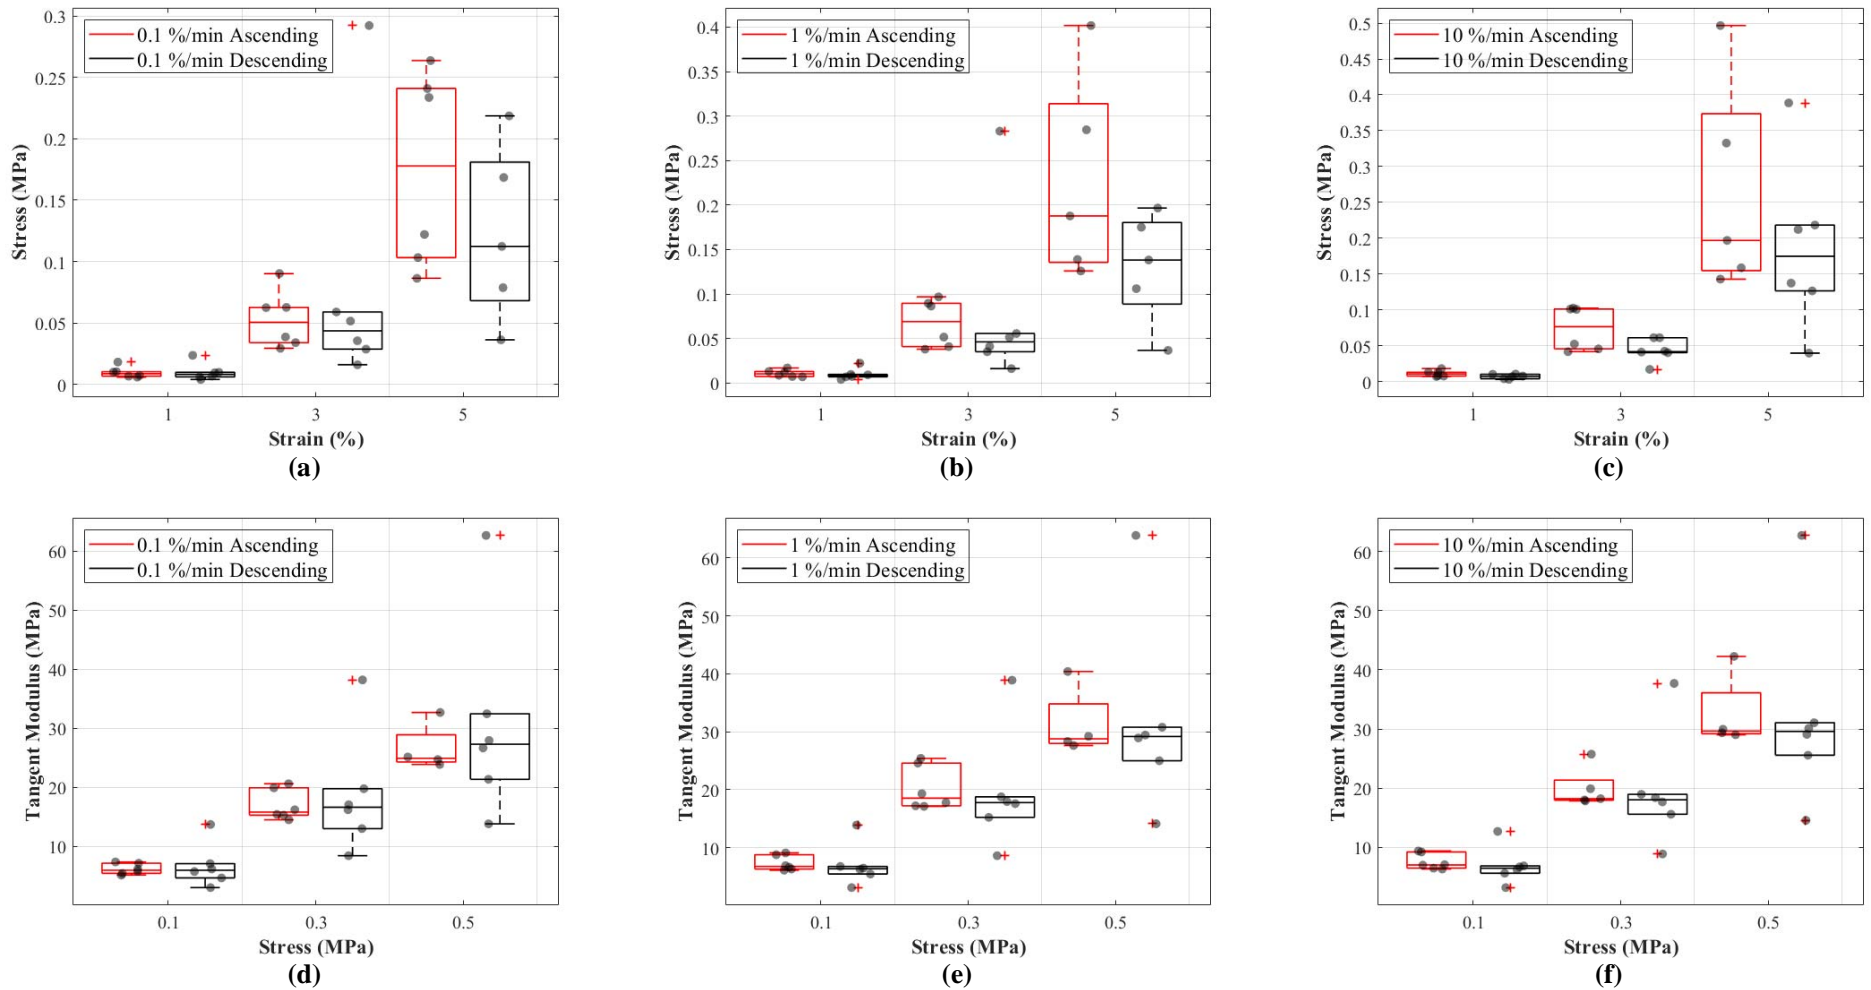

**Figure 4:** Tensile behaviour of the canine cranial cruciate ligaments was investigated following ascending (red line) and descending (black line) protocols at varying strain rates. The box plots show specimen variation, stress at 1, 3 and 5% strain during loading at (a) 0.1 %/min, (b) 1 %/min and (c) 10 %/min strain rates, and tangent modulus at 0.1, 0.3 and 0.5 MPa stress during loading at (d) 0.1 %/min, (e) 1 %/min and (f) 10 %/min strain rates. The outliers are indicated with a red plus sign.

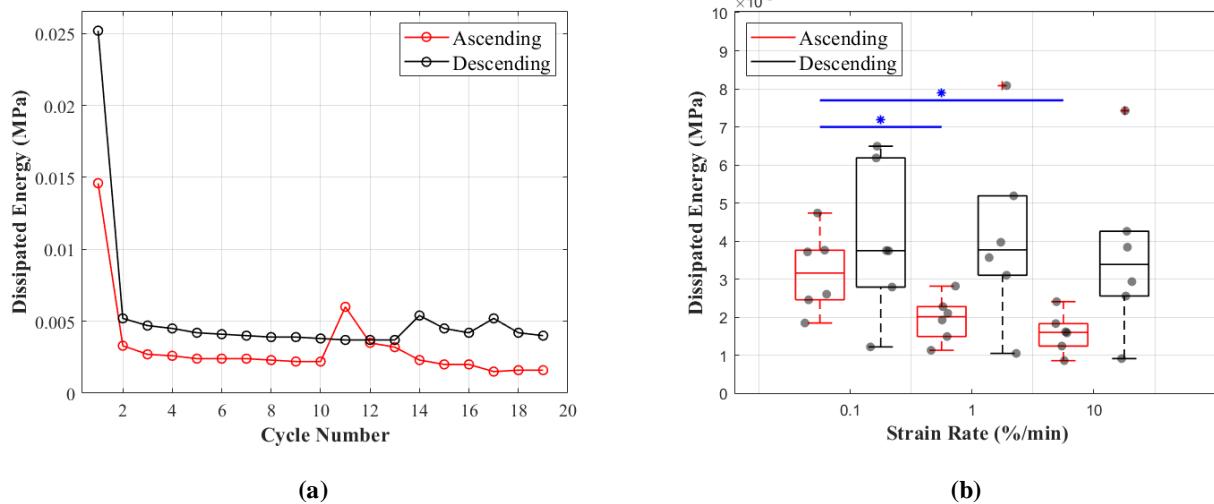

**Figure 5:** Dissipated energy of the canine cranial cruciate ligaments (CCL) during cyclic loading at varying strain rates. (a) This figure shows the decrease in mean dissipated energy with increasing cycles of loads. The first ten cycles represent dissipated energy during the precondition stage of the CCLs. From cycles 11 to 19 dissipated energy values are associated with CCLs during tensile tests at three different strain rates (0.1, 1 and 10 %/min with each test repeated three times). The ascending testing protocol (red line) resulted in a slightly lower dissipated energy compared to the descending (black line) testing protocol. (b) This figure shows variations in dissipated energy within the specimens. The median values (indicated by the horizontal line inside the boxes) show a decrease in dissipated energy (hysteresis) with increasing strain rates. However, this observation was only statistically significant (blue line and \*) between tensile tests at strain rates of 0.1 and 1 %/min, and 0.1 and 10 %/min.

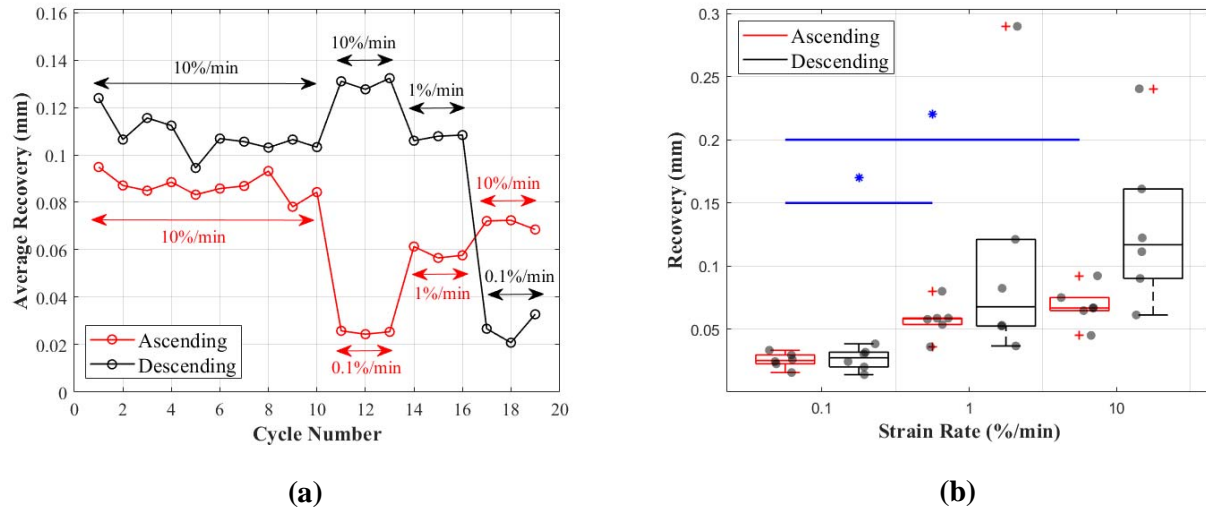

**Figure 6:** Recovery of the canine cranial cruciate ligaments (CCL) during cyclic loading at varying strain rates. (a) This figure shows the average recovered length of the CCLs at different cycles. During the preconditioning cycles (the first ten cycles) recovered lengths of the ligaments are similar. Cycles associated with mechanical tests (cycles 11 to 19) for both testing protocols (ascending in red and descending in black) showed an increase in recovery with increasing strain rates. (b) This figure shows variations in length recovery within the CCLs. The box plots show an increase in recovery with increasing strain rates. This characteristic was statistically significant between tensile tests at strain rates of 0.1 and 1 %/min, and 0.1 and 10 %/min as indicated by the blue \* and line.

**Table 1:**

The measured length of cranial cruciate ligaments (CCL) at different measurement planes (cranial, caudal, medial and lateral) for CCLs in paired canine stifle joints (n=6 pairs).

| No.                                  | Cranial Plane<br>(mm) |       | Caudal Plane<br>(mm) |       | Medial Plane<br>(mm) |       | Lateral Plane<br>(mm) |       | Average $\pm$ SD<br>(mm) |                   |
|--------------------------------------|-----------------------|-------|----------------------|-------|----------------------|-------|-----------------------|-------|--------------------------|-------------------|
|                                      | Right                 | Left  | Right                | Left  | Right                | Left  | Right                 | Left  | Right                    | Left              |
| <b>1</b>                             | 13.51                 | 14.54 | 7.88                 | 8.16  | 11.76                | 14.10 | 11.00                 | 12.31 | 11.04 $\pm$ 2.35         | 12.28 $\pm$ 2.91  |
| <b>2</b>                             | 22.79                 | 22.07 | 11.20                | 12.00 | 17.00                | 13.1  | 20.54                 | 16.93 | 17.88 $\pm$ 5.05         | 16.03 $\pm$ 4.55  |
| <b>3</b>                             | 22.14                 | 22.22 | 10.21                | 9.78  | 17.5                 | 20.36 | 20.83                 | 19.71 | 17.67 $\pm$ 5.34         | 18.02 $\pm$ 5.59  |
| <b>4</b>                             | 21.44                 | 23.16 | 13.53                | 11.55 | 17.51                | 19.05 | 16.05                 | 14.37 | 17.13 $\pm$ 3.31         | 17.033 $\pm$ 5.12 |
| <b>5</b>                             | 17.88                 | 18.58 | 10.37                | 13.02 | 13.94                | 15.12 | 16.51                 | 16.82 | 14.68 $\pm$ 3.30         | 15.89 $\pm$ 2.38  |
| <b>6</b>                             | 15.30                 | 17.83 | 9.20                 | 9.38  | 13.50                | 15.81 | 13.1                  | 12.31 | 12.78 $\pm$ 2.57         | 13.83 $\pm$ 3.74  |
| <b>Mean <math>\pm</math> SD (mm)</b> | 19.29 $\pm$ 3.47      |       | 10.5 2 $\pm$ 1.79    |       | 15.73 $\pm$ 2.60     |       | 15.87 $\pm$ 3.34      |       |                          |                   |
| <b>Coefficient of Variation (%)</b>  | 18.0                  |       | 17.0                 |       | 16.5                 |       | 21.0                  |       |                          |                   |



**Table 2:**

The cross-sectional areas of cranial cruciate ligaments (CCL) for CCLs in paired canine stifle joints (n=6 pairs).

| <b>No.</b>                          | <b>Cross-sectional area (mm<sup>2</sup>)</b> |                 |
|-------------------------------------|----------------------------------------------|-----------------|
|                                     | <b>Right CCL</b>                             | <b>Left CCL</b> |
| <b>1</b>                            | 12.58                                        | 14.99           |
| <b>2</b>                            | 14.39                                        | 14.41           |
| <b>3</b>                            | 11.09                                        | 29.08           |
| <b>4</b>                            | 15.48                                        | 13.98           |
| <b>5</b>                            | 12.91                                        | 15.69           |
| <b>6</b>                            | 14.93                                        | 23.62           |
| <b>Mean ± SD (mm<sup>2</sup>)</b>   | 16.10 ± 5.10                                 |                 |
| <b>Coefficient of Variation (%)</b> | 31.7                                         |                 |
